# Supplementary material for: A novel and simple solvent-dependent fluorescent probe based on a click generated 8-aminoquinoline–steroid conjugate for multi-detection of Cu(ii), oxalate and pyrophosphate
Source: Royal Society of Chemistry journal article supplement (doi:10.1039/c7ra01620d), 2017-01-01
Supplement: c7ra01620d1.pdf [file c7ra01620d1.pdf]

## Electronic Supplementary Information

### **A novel and simple solvent-dependent fluorescent probe based on a click generated 8-aminoquinoline–steroid conjugate for multi-detection of Cu(II), oxalate and pyrophosphate**

Zhen Zhang\*, Yuan Zou and Chengquan Deng

Department of Applied Chemistry, School of Science, Xi'an Jiaotong University, Xi'an 710049, China. E-mail: zzlinda@mail.xjtu.edu.cn; Fax: +86 29 82668559; Tel: +86 29 82663914.

### **Contents**

1.  $^1\text{H}$  NMR spectrum of compound **2**
2.  $^1\text{H}$  NMR spectrum of compound **3**
3.  $^1\text{H}$  NMR,  $^{13}\text{C}$  NMR, and HR-ESI-MS spectra of probe **1**
4. UV-vis absorption spectra of probe **1** with different levels of  $\text{Cu}^{2+}$
5. UV-vis absorption spectra of probe **1** with different metal ions
6. Effects of  $\text{CH}_3\text{CN}$  content on the fluorescence response of probe **1** to  $\text{Cu}^{2+}$
7. Effects of pH on the fluorescence response of probe **1** to  $\text{Cu}^{2+}$
8. Time-dependent fluorescence response of probe **1** upon addition of  $\text{Cu}^{2+}$
9. UV-vis absorption spectra of probe **1** with different anions
10. UV-vis absorption spectra of probe **1** with different levels of  $\text{C}_2\text{O}_4^{2-}/\text{P}_2\text{O}_7^{4-}$
11. Effects of DMSO content on the fluorescence response of probe **1** to  $\text{C}_2\text{O}_4^{2-}/\text{P}_2\text{O}_7^{4-}$
12. Effects of pH on the fluorescence response of probe **1** to  $\text{C}_2\text{O}_4^{2-}/\text{P}_2\text{O}_7^{4-}$
13. Time-dependent fluorescence response of probe **1** upon addition of  $\text{C}_2\text{O}_4^{2-}/\text{P}_2\text{O}_7^{4-}$
14.  $^1\text{H}$  NMR spectra of probe **1** measured before and after addition of  $\text{Cu}^{2+}$
15. The reversibility of probe **1** for  $\text{Cu}^{2+}$  detection
16. The reversibility of probe **1** for  $\text{C}_2\text{O}_4^{2-}/\text{P}_2\text{O}_7^{4-}$  detection
17. Comparison of the recently reported multi-detection probes for  $\text{Cu}^{2+}$ ,  $\text{C}_2\text{O}_4^{2-}$  and  $\text{P}_2\text{O}_7^{4-}$

1.  $^1\text{H}$  NMR spectrum of compound **2**

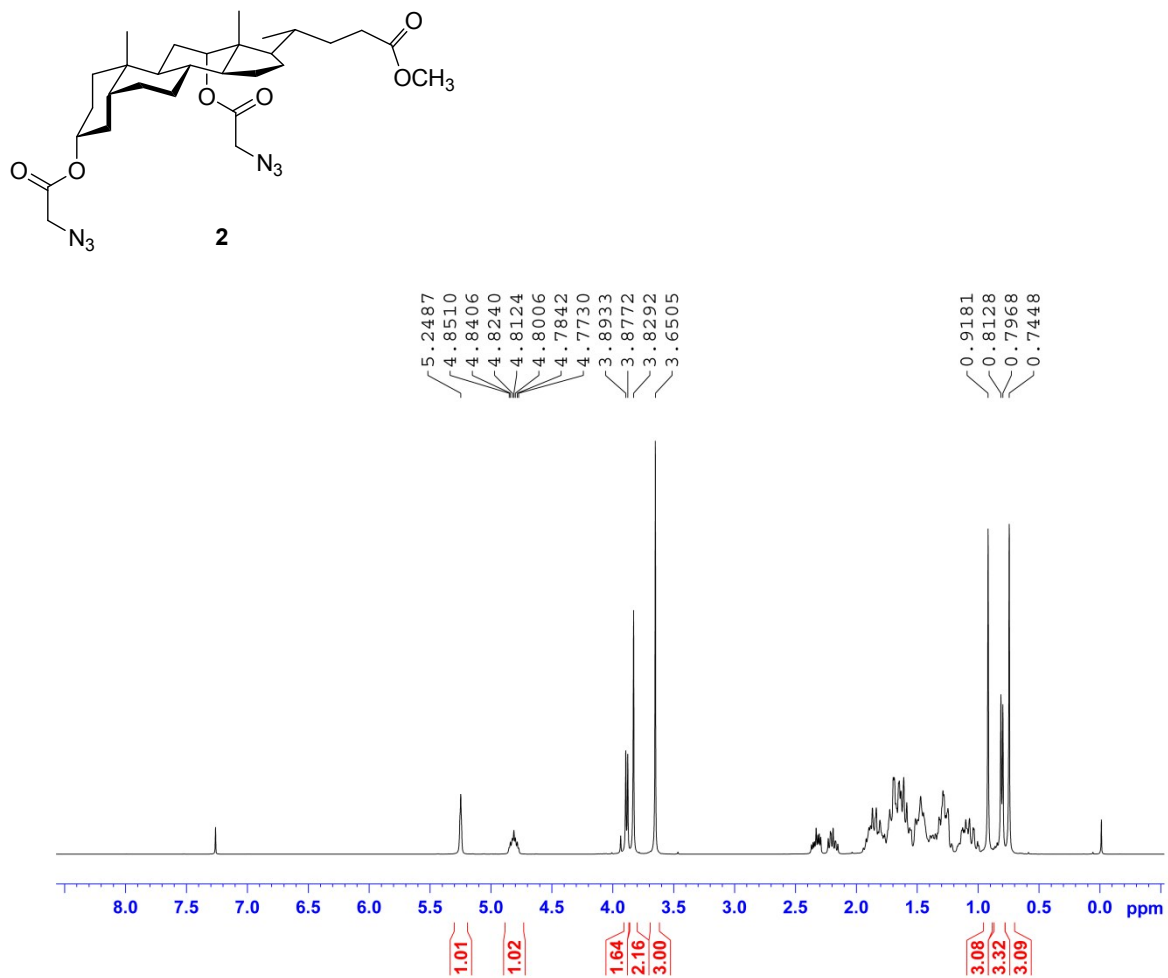

**Fig. S1**  $^1\text{H}$  NMR spectrum of compound **2**.

2.  $^1\text{H}$  NMR spectrum of compound **3**

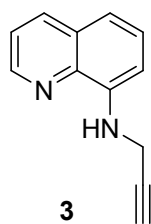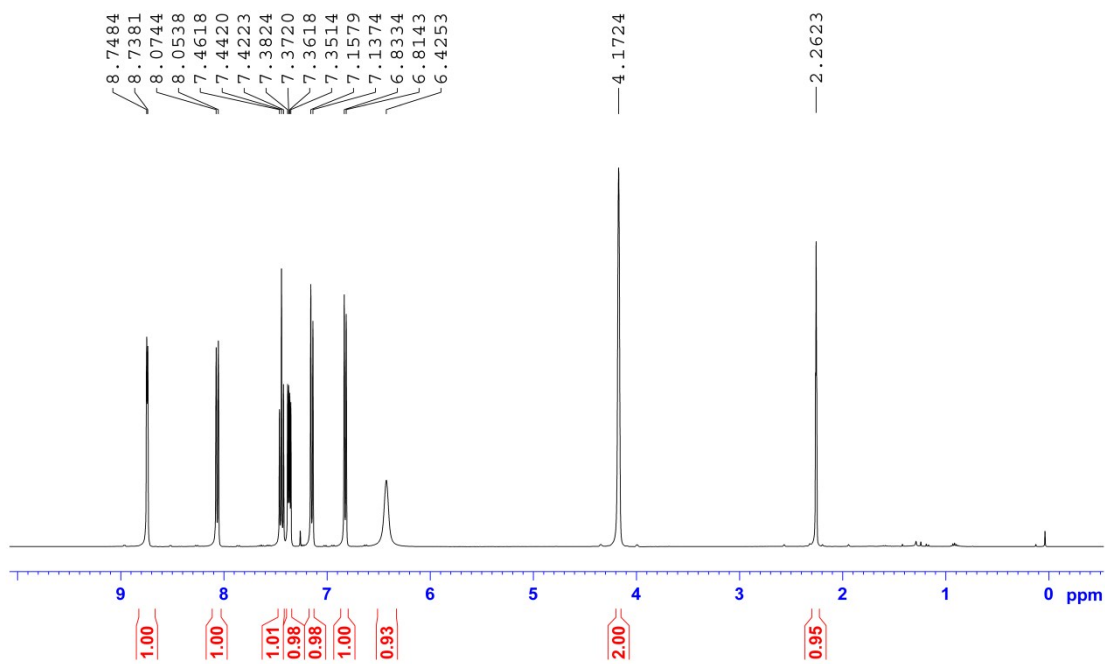

Fig. S2  $^1\text{H}$  NMR spectrum of compound **3**.

3.  $^1\text{H}$  NMR,  $^{13}\text{C}$  NMR, and HR-ESI-MS spectra of probe **1**

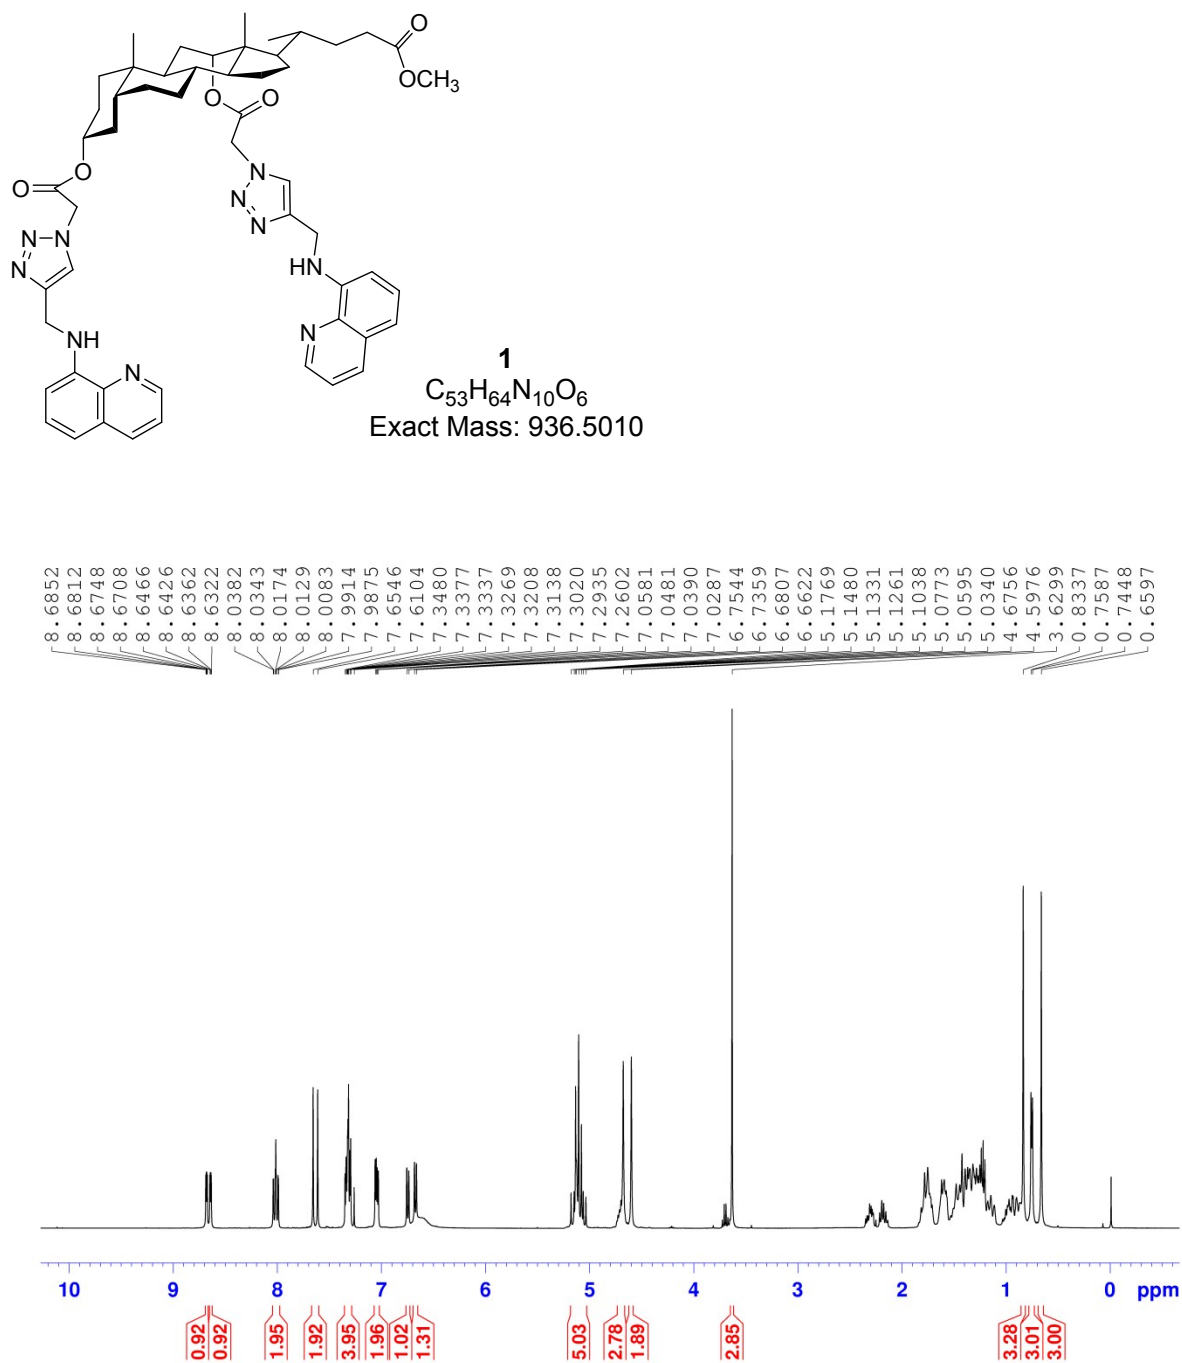

**Fig. S3**  $^1\text{H}$  NMR spectrum of probe **1**.

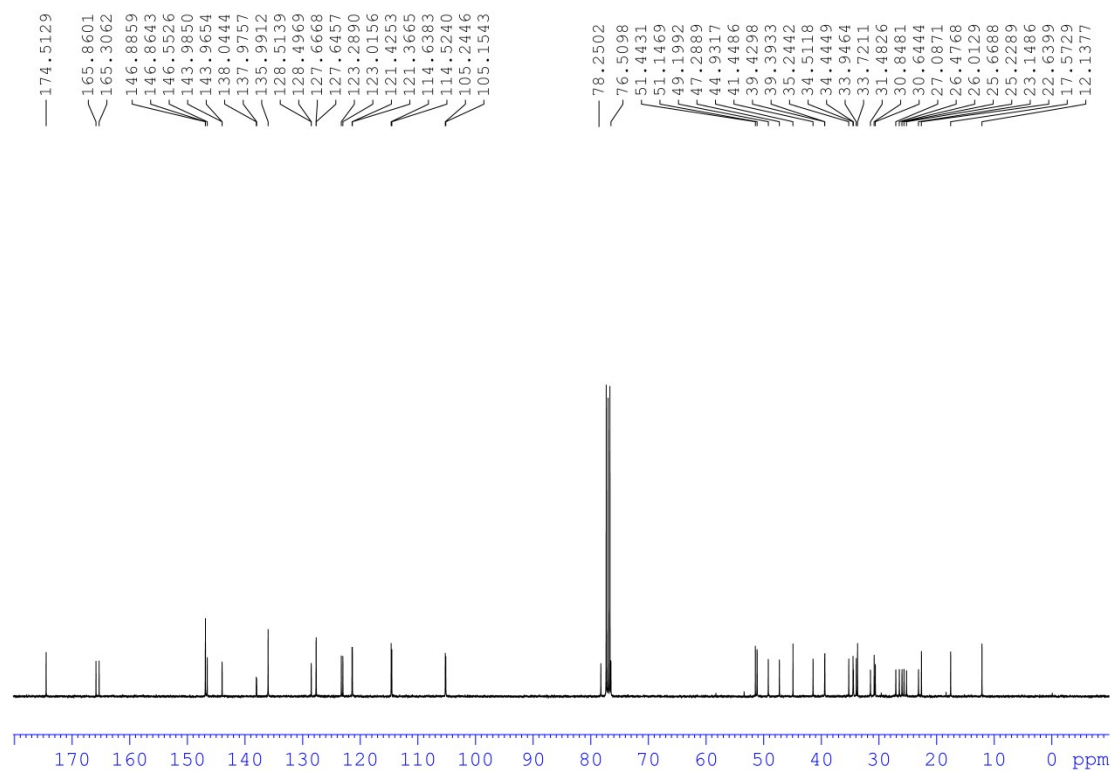

**Fig. S4**  $^{13}\text{C}$  NMR spectrum of probe 1.

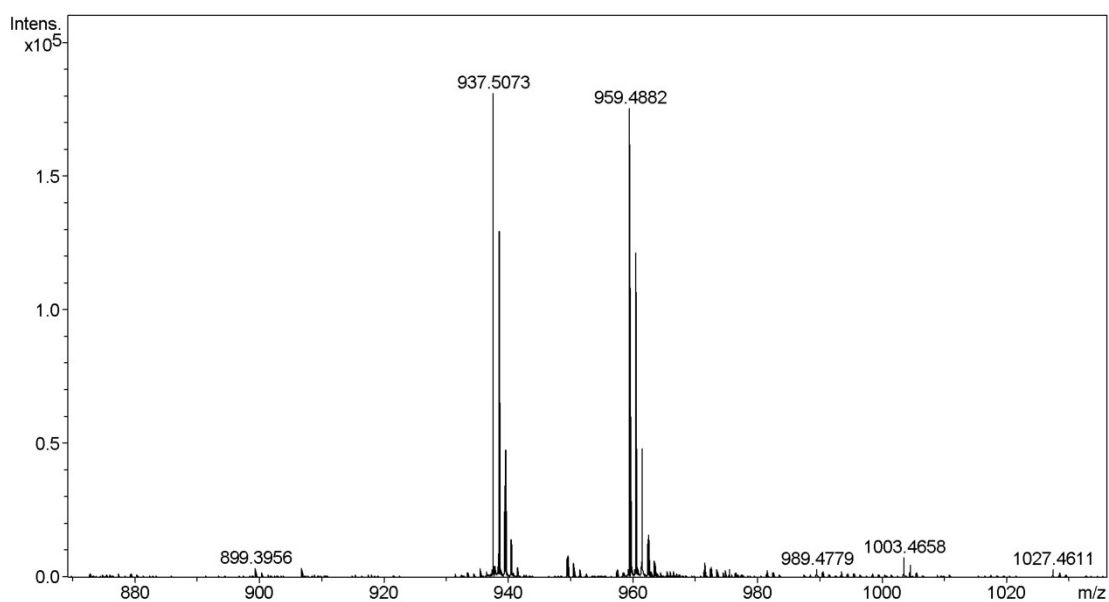

**Fig. S5** HR-ESI-MS spectrum of probe 1.

#### 4. UV-vis absorption spectra of probe **1** with different levels of $\text{Cu}^{2+}$

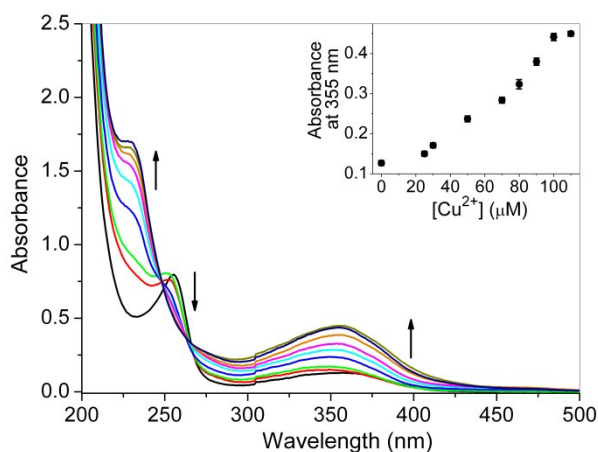

**Fig. S6** UV-vis absorption spectra of probe **1** (20  $\mu\text{M}$ ) with different levels of  $\text{Cu}^{2+}$  (from bottom to top: 0, 25, 30, 50, 70, 80, 90, 100 and 110  $\mu\text{M}$ ) in  $\text{CH}_3\text{CN}-\text{H}_2\text{O}$  (99/1, v/v, 10 mM HEPES, pH 7.2). Inset: absorbance changes of probe **1** at 355 nm as a function of  $\text{Cu}^{2+}$  concentration.

#### 5. UV-vis absorption spectra of probe **1** with different metal ions

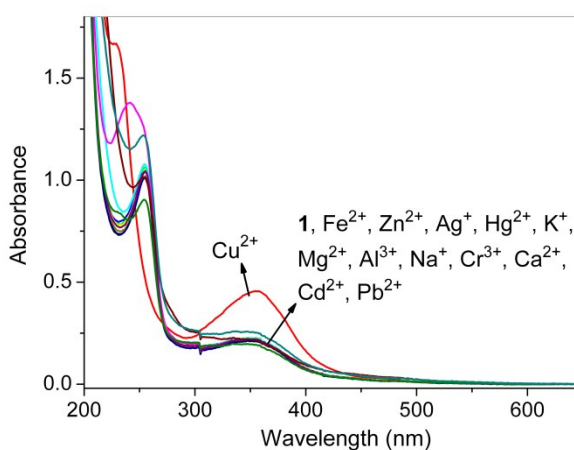

**Fig. S7** UV-vis absorption spectra of probe **1** (20  $\mu\text{M}$ ) with different metal ions (100  $\mu\text{M}$ ) in  $\text{CH}_3\text{CN}-\text{H}_2\text{O}$  (99/1, v/v, 10 mM HEPES, pH 7.2).

6. Effects of CH<sub>3</sub>CN content on the fluorescence response of probe **1** to Cu<sup>2+</sup>

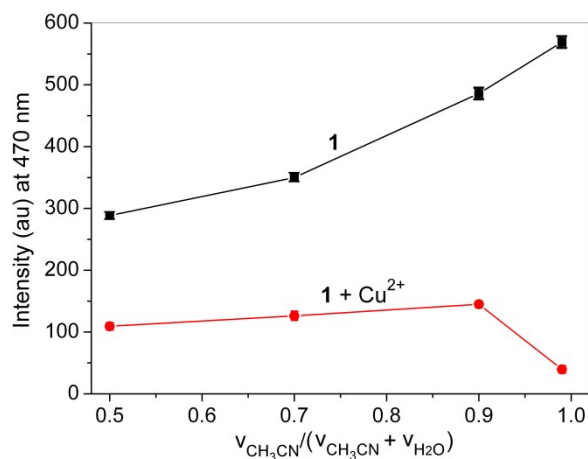

**Fig. S8** Effects of CH<sub>3</sub>CN content on the fluorescence intensity of probe **1** (20 μM) at 470 nm in the absence and presence of Cu<sup>2+</sup> (100 μM) in aqueous solution (10 mM HEPES, pH 7.2).  $\lambda_{\text{ex}} = 350$  nm.

7. Effects of pH on the fluorescence response of probe **1** to Cu<sup>2+</sup>

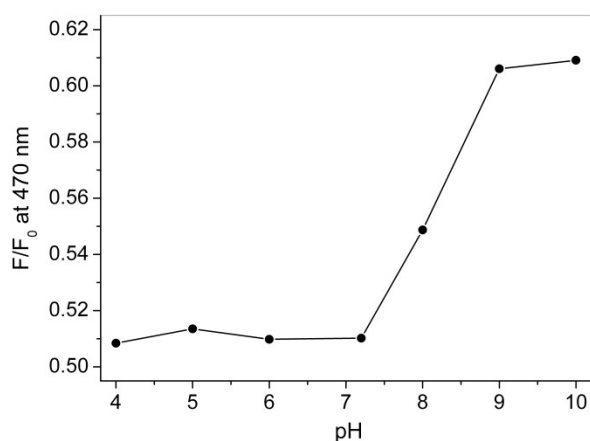

**Fig. S9** Fluorescence intensity ratios of probe **1** (20 μM) at 470 nm after (F) and before (F<sub>0</sub>) addition of Cu<sup>2+</sup> (50 μM) in CH<sub>3</sub>CN–H<sub>2</sub>O (99/1, v/v, 10 mM HEPES) at various pH values (from 4.0 to 10.0).  $\lambda_{\text{ex}} = 350$  nm.

## 8. Time-dependent fluorescence response of probe **1** upon addition of $\text{Cu}^{2+}$

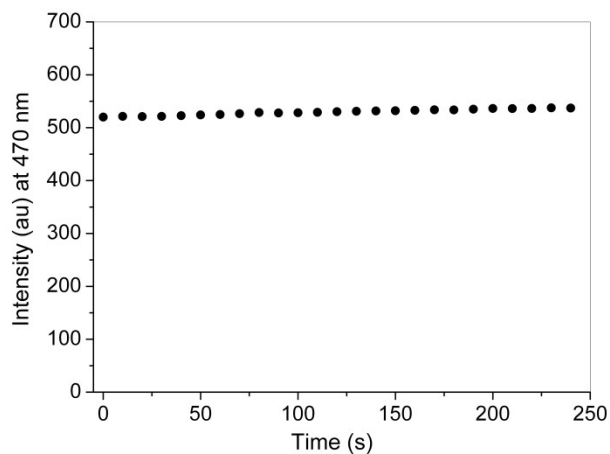

**Fig. S10** Time course of the fluorescence intensity changes of probe **1** (20  $\mu\text{M}$ ) at 470 nm upon addition of  $\text{Cu}^{2+}$  (10  $\mu\text{M}$ ) in  $\text{CH}_3\text{CN-H}_2\text{O}$  (99/1, v/v, 10 mM HEPES, pH 7.2).  $\lambda_{\text{ex}} = 350$  nm.

## 9. UV-vis absorption spectra of probe **1** with different anion

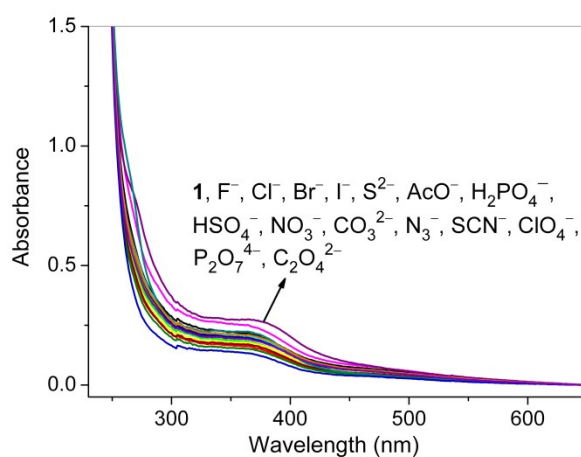

**Fig. S11** UV-vis absorption spectra of probe **1** (20  $\mu\text{M}$ ) with different anions (30  $\mu\text{M}$ ) in  $\text{DMSO-H}_2\text{O}$  (1/1, v/v, 10 mM HEPES, pH 7.2).

## 10. UV-vis absorption spectra of probe **1** with different levels of $\text{C}_2\text{O}_4^{2-}/\text{P}_2\text{O}_7^{4-}$



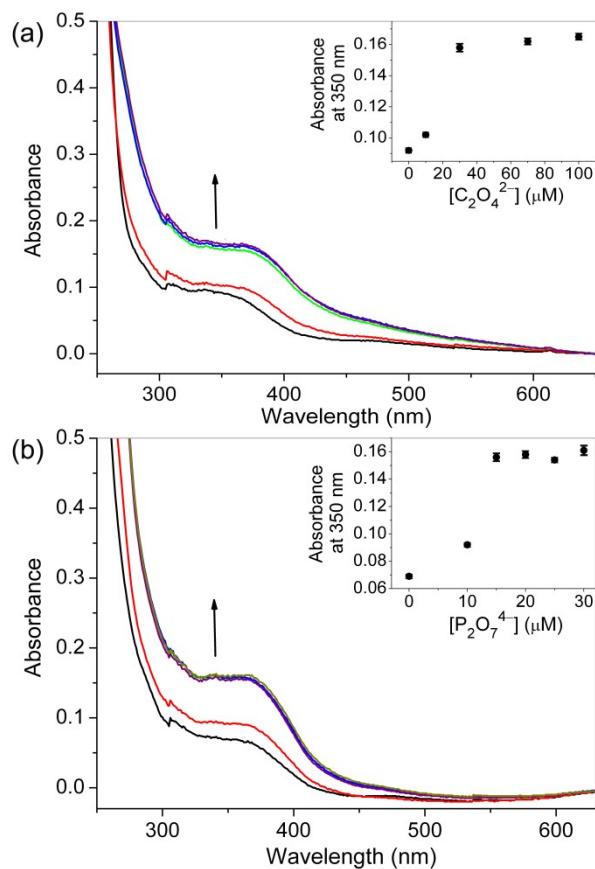

**Fig. S12** UV-vis absorption spectra of probe **1** (20 μM) with different levels of (a) C<sub>2</sub>O<sub>4</sub><sup>2-</sup> (from bottom to top: 0, 10, 30, 70 and 100 μM) and (b) P<sub>2</sub>O<sub>7</sub><sup>4-</sup> (from bottom to top: 0, 10, 15, 20, 25 and 30 μM) in DMSO-H<sub>2</sub>O (1/1, v/v, 10 mM HEPES, pH 7.2).

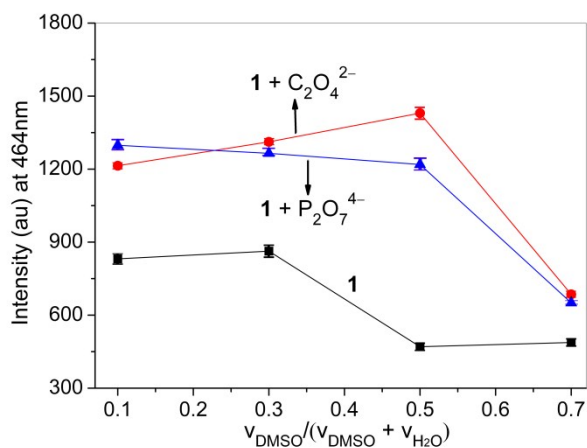

**Fig. S13** Effects of DMSO content on the fluorescence intensity of probe **1** (20  $\mu\text{M}$ ) at 464 nm in the absence and presence of  $\text{C}_2\text{O}_4^{2-}/\text{P}_2\text{O}_7^{4-}$  (50  $\mu\text{M}$ ) in aqueous solution (10 mM HEPES, pH 7.2).  $\lambda_{\text{ex}} = 350$  nm.

## 12. Effects of pH on the fluorescence response of probe **1** to $\text{C}_2\text{O}_4^{2-}/\text{P}_2\text{O}_7^{4-}$

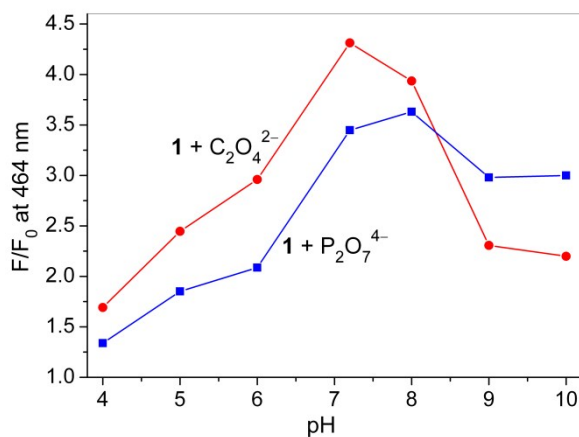

**Fig. S14** Fluorescence intensity ratios of probe **1** (20  $\mu\text{M}$ ) at 464 nm after (F) and before ( $F_0$ ) addition of  $\text{C}_2\text{O}_4^{2-}/\text{P}_2\text{O}_7^{4-}$  (50  $\mu\text{M}$ ) in DMSO– $\text{H}_2\text{O}$  (1/1, v/v, 10 mM HEPES) at various pH values (from 4.0 to 10.0).  $\lambda_{\text{ex}} = 350$  nm.

## 13. Time-dependent fluorescence response of probe **1** upon addition of $\text{C}_2\text{O}_4^{2-}/\text{P}_2\text{O}_7^{4-}$

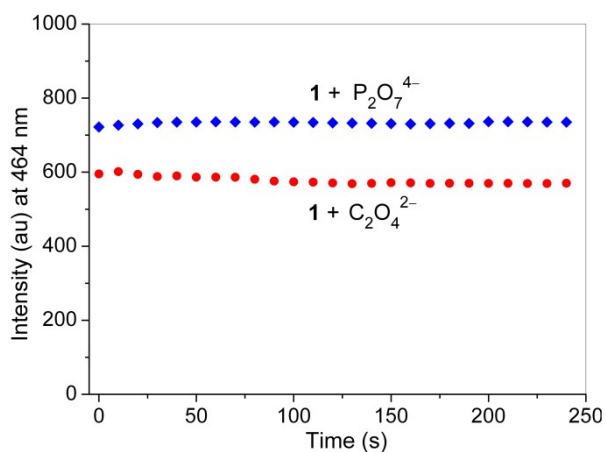

**Fig. S15** Time course of the fluorescence intensity changes of probe **1** (20  $\mu\text{M}$ ) at 464 nm upon addition of  $\text{C}_2\text{O}_4^{2-}/\text{P}_2\text{O}_7^{4-}$  (10  $\mu\text{M}$ ) in DMSO– $\text{H}_2\text{O}$  (1/1, v/v, 10 mM HEPES, pH 7.2).  $\lambda_{\text{ex}} = 350$  nm.

14.  $^1\text{H}$  NMR spectra of probe **1** measured before and after addition of  $\text{Cu}^{2+}$

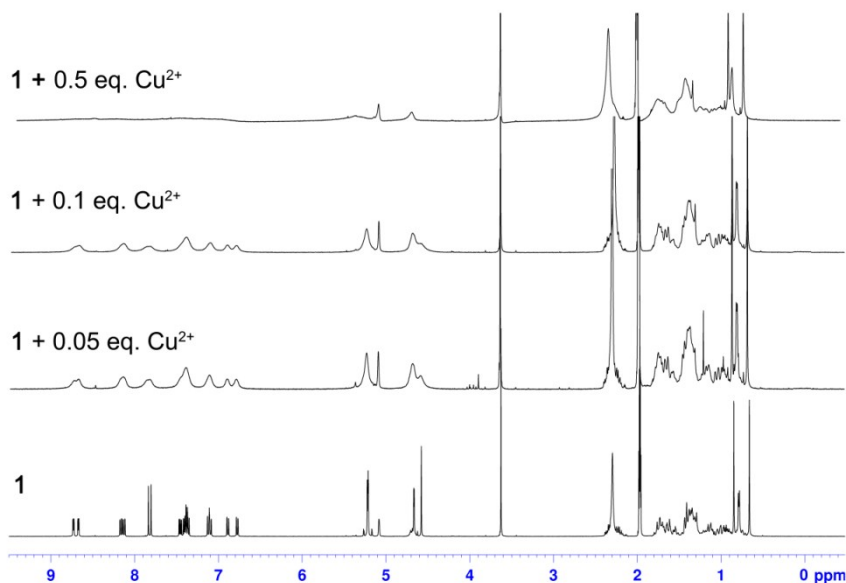

**Fig. S16**  $^1\text{H}$  NMR spectra of probe **1** (10 mM) measured before and after addition of  $\text{Cu}^{2+}$  (0.05, 0.1 and 0.5 equivalent) in  $\text{CD}_3\text{CN}-\text{D}_2\text{O}$  (99/1, v/v).

15. The reversibility of probe **1** for  $\text{Cu}^{2+}$  detection

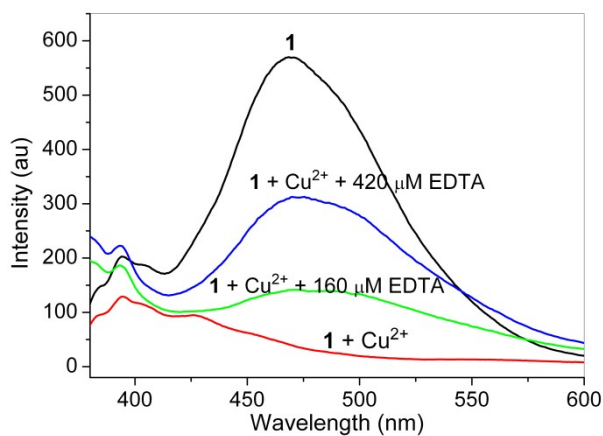

**Fig. S17** Fluorescence spectra of probe **1**-Cu<sup>2+</sup> complex with different levels of EDTA in CH<sub>3</sub>CN-H<sub>2</sub>O (99/1, v/v, 10 mM HEPES, pH 7.2). Probe **1** (20 M), Cu<sup>2+</sup> (100 μM). λ<sub>ex</sub> = 350 nm.

#### 16. The reversibility of probe **1** for C<sub>2</sub>O<sub>4</sub><sup>2-</sup>/P<sub>2</sub>O<sub>7</sub><sup>4-</sup> detection

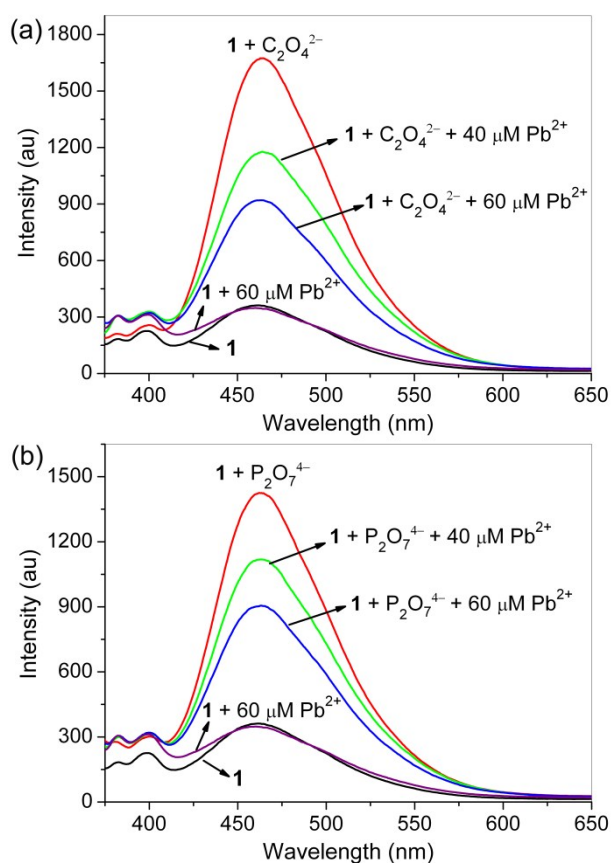

**Fig. S18** Fluorescence spectra of (a) probe **1**-C<sub>2</sub>O<sub>4</sub><sup>2-</sup> complex and (b) probe **1**-P<sub>2</sub>O<sub>7</sub><sup>4-</sup> complex with different levels of Pb<sup>2+</sup> in DMSO-H<sub>2</sub>O (1/1, v/v, 10 mM HEPES, pH 7.2). Probe **1** (20 M), C<sub>2</sub>O<sub>4</sub><sup>2-</sup>/P<sub>2</sub>O<sub>7</sub><sup>4-</sup> (100 μM). λ<sub>ex</sub> = 350 nm.

17. **Table S1.** Comparison of the recently reported multi-detection probes for  $\text{Cu}^{2+}$ ,  $\text{C}_2\text{O}_4^{2-}$  and  $\text{P}_2\text{O}_7^{4-}$

| Probe                                                                                                                                      | Detection mode and properties                                                                                                                                                                                                                                                                                                                                                                                                                                                 | $K_a$                                                                                  | Detection limit                                                                       | Response time  |
|--------------------------------------------------------------------------------------------------------------------------------------------|-------------------------------------------------------------------------------------------------------------------------------------------------------------------------------------------------------------------------------------------------------------------------------------------------------------------------------------------------------------------------------------------------------------------------------------------------------------------------------|----------------------------------------------------------------------------------------|---------------------------------------------------------------------------------------|----------------|
| carbon dots<br><i>Mater. Lett.</i> , 2014, <b>115</b> , 233                                                                                | fluorescent turn-off/on for sequential detection of $\text{Cu}^{2+}$ and $\text{C}_2\text{O}_4^{2-}$ (based on $\text{Cu}^{2+}$ displacement approach) in Tris buffer solution, $\lambda_{\text{ex}}/\lambda_{\text{em}}$ 470/543 nm, quantitative detection ranged from 10–90 $\mu\text{M}$ for $\text{Cu}^{2+}$ , and 10–70 $\mu\text{M}$ for $\text{C}_2\text{O}_4^{2-}$                                                                                                   | no data                                                                                | 1 $\mu\text{M}$ for $\text{C}_2\text{O}_4^{2-}$                                       | rapid, no data |
| 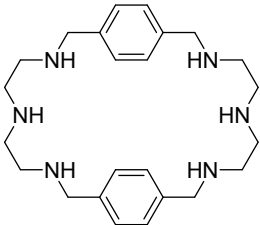<br><i>Chem. Commun.</i> , 2012, <b>48</b> , 6951        | by fluorescent indicator (fluorescein, $\lambda_{\text{ex}}/\lambda_{\text{em}}$ 470/510 nm, and eosin Y, $\lambda_{\text{ex}}/\lambda_{\text{em}}$ 490/540 nm) displacement assays, macrocyclic(L)– $\text{Cu}^{2+}$ complex formed an ensemble with $\text{C}_2\text{O}_4^{2-}$ and showed off-on fluorescent sensing for $\text{C}_2\text{O}_4^{2-}$ in water at neutral pH with quantitative detection ranged from 0–5 $\mu\text{M}$ using $\text{Cu}_2\text{L}$ –Eosin Y | $> 10^7 \text{ M}^{-1}$ for $\text{C}_2\text{O}_4^{2-}$                                | 0.079 $\mu\text{M}$ for $\text{C}_2\text{O}_4^{2-}$ by $\text{Cu}_2\text{L}$ –Eosin Y | no data        |
| <br><i>J. Am. Chem. Soc.</i> , 2008, <b>130</b> , 12606 | by the fluorescent indicator eosin Y displacement, a dimacrocyclic– $\text{Cu}^{2+}$ complex could form an ensemble with $\text{C}_2\text{O}_4^{2-}$ and showed off-on fluorescent sensing ( $\lambda_{\text{ex}}/\lambda_{\text{em}}$ 524/537 nm) for $\text{C}_2\text{O}_4^{2-}$ in water at neutral pH                                                                                                                                                                     | $(1.3 \pm 0.1) \times 10^5 \text{ M}^{-1}$ for $\text{C}_2\text{O}_4^{2-}$             | no data                                                                               | no data        |
| <br><i>Sens. Actuators B</i> , 2016, <b>233</b> , 591   | by indicator (pyrocatechol violet, colorimetric indicator, ratio of $A_{655}/A_{444}$ ; esculetine, fluorescent indicator, $\lambda_{\text{ex}}/\lambda_{\text{em}}$ 380/465 nm) displacement, a dinuclear– $\text{Cu}^{2+}$ complex with two ammonium arms formed an ensemble with $\text{P}_2\text{O}_7^{4-}$ , showing color changes and off-on fluorescence in aqueous solution                                                                                           | by the UV indicator, $8.55 \times 10^6 \text{ M}^{-1}$ for $\text{P}_2\text{O}_7^{4-}$ | 0.15 $\mu\text{M}$ for $\text{P}_2\text{O}_7^{4-}$ by fluorescence assay              | no data        |

| Probe                                                                                                                                     | Detection mode and properties                                                                                                                                                                                                                                                                                                                                                                                                                                                                                                                            | $K_a$                                                             | Detection limit                                                                           | Response time |
|-------------------------------------------------------------------------------------------------------------------------------------------|----------------------------------------------------------------------------------------------------------------------------------------------------------------------------------------------------------------------------------------------------------------------------------------------------------------------------------------------------------------------------------------------------------------------------------------------------------------------------------------------------------------------------------------------------------|-------------------------------------------------------------------|-------------------------------------------------------------------------------------------|---------------|
| 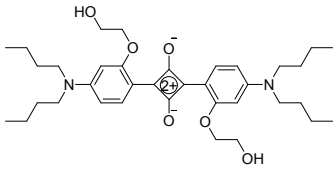 <p><i>Sens. Actuators B</i>, 2016, <b>233</b>, 550</p>  | <p>a squaraine-based fluorescent probe chelated <math>\text{Cu}^{2+}</math> and showed on-off sensing (<math>\lambda_{\text{ex}}/\lambda_{\text{em}}</math> 620/670 nm, quantitative detection range 0.5–3.5 <math>\mu\text{M}</math>) in MeCN–<math>\text{H}_2\text{O}</math> (9/1, v/v). <math>\text{P}_2\text{O}_7^{4-}</math> extracted <math>\text{Cu}^{2+}</math> from the probe–<math>\text{Cu}^{2+}</math> complex and restored the spectral signal of free probe (quantitative detection range 0–25 <math>\mu\text{M}</math>)</p>               | no data                                                           | near 15 nM for $\text{Cu}^{2+}$ , and 0.072 $\mu\text{M}$ for $\text{P}_2\text{O}_7^{4-}$ | no data       |
|  <p><i>Sens. Actuators B</i>, 2016, <b>229</b>, 131</p> | <p>a flavonoid-based probe exhibited fluorescence quenching (<math>\lambda_{\text{ex}}/\lambda_{\text{em}}</math> 390/510 nm) to <math>\text{Cu}^{2+}</math> with quantitative detection ranged from 0–10 <math>\mu\text{M}</math> in DMSO–<math>\text{H}_2\text{O}</math> (v/v = 9/1, 0.1 mM PBS, pH 7.4). Moreover, the probe–<math>\text{Cu}^{2+}</math> complex could also be used for secondary sensing of <math>\text{P}_2\text{O}_7^{4-}</math> based on <math>\text{Cu}^{2+}</math> displacement approach with fluorescence turn-on behavior</p> | no data                                                           | lower than 100 nM for $\text{Cu}^{2+}$                                                    | no data       |
| <p>carbon quantum dots with rich carboxyl groups on the surface</p> <p><i>Biosens. Bioelectron.</i>, 2015, <b>68</b>, 675</p>             | <p>richness of carboxyl on the surface of carbon quantum dots enables aggregation caused fluorescence quenching by <math>\text{Cu}^{2+}</math>, and the competitive interaction among carboxyl, <math>\text{Cu}^{2+}</math> and <math>\text{P}_2\text{O}_7^{4-}</math> endows disaggregation induced fluorescence enhancement, <math>\lambda_{\text{ex}}/\lambda_{\text{em}}</math> 452/525 nm</p>                                                                                                                                                       | no data                                                           | 0.3 $\mu\text{M}$ for $\text{P}_2\text{O}_7^{4-}$                                         | real-time     |
|  <p><i>Org. Lett.</i>, 2014, <b>16</b>, 2220</p>       | <p>by colorimetric indicator (pyrocatechol violet, ratio of <math>A_{630}/A_{444}</math>) displacement, a dinuclear–<math>\text{Cu}^{2+}</math> complex with ammonium moieties formed an ensemble with <math>\text{P}_2\text{O}_7^{4-}</math>, showing colorimetric changes in aqueous solution</p>                                                                                                                                                                                                                                                      | $5.75 \times 10^6 \text{ M}^{-1}$ for $\text{P}_2\text{O}_7^{4-}$ | no data                                                                                   | no data       |

| Probe                                                                                                                                        | Detection mode and properties                                                                                                                                                                                                                                                                                                                                                                                                                                                                                                                                                                                                                   | $K_a$                                                                                                                                                                                                                 | Detection limit                                                                                                                                                       | Response time                    |
|----------------------------------------------------------------------------------------------------------------------------------------------|-------------------------------------------------------------------------------------------------------------------------------------------------------------------------------------------------------------------------------------------------------------------------------------------------------------------------------------------------------------------------------------------------------------------------------------------------------------------------------------------------------------------------------------------------------------------------------------------------------------------------------------------------|-----------------------------------------------------------------------------------------------------------------------------------------------------------------------------------------------------------------------|-----------------------------------------------------------------------------------------------------------------------------------------------------------------------|----------------------------------|
| 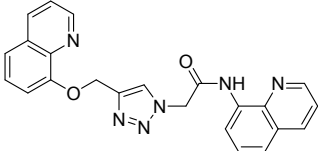 <p><i>Tetrahedron Lett.</i>, 2013, <b>54</b>, 5948</p>     | <p>a quinoline derivative was used as a fluorescent probe for sequential sensing (<math>\lambda_{ex}/\lambda_{em}</math> 305/412 nm) of <math>\text{Cu}^{2+}</math> and <math>\text{P}_2\text{O}_7^{4-}</math> in DMSO–<math>\text{H}_2\text{O}</math> (1/1, v/v, 20 mM HEPES, pH 7.4). The probe displayed high selectivity to <math>\text{Cu}^{2+}</math> (quantitative detection range 0–20 <math>\mu\text{M}</math>), and the probe–<math>\text{Cu}^{2+}</math> showed high selectivity to <math>\text{P}_2\text{O}_7^{4-}</math> (quantitative detection range 1–20 <math>\mu\text{M}</math>) with emission recovery of the free probe</p> | $1.59 \times 10^7$<br>$\text{M}^{-1}$ for<br>$\text{Cu}^{2+}$                                                                                                                                                         | 4.47 $\mu\text{M}$<br>for $\text{Cu}^{2+}$ ,<br>and 3.16<br>$\mu\text{M}$ for<br>$\text{P}_2\text{O}_7^{4-}$                                                          | no data                          |
|  <p><i>Biosens. Bioelectron.</i>, 2011, <b>30</b>, 282</p> | <p>a turn-on fluorescent probe (<math>\lambda_{ex}/\lambda_{em}</math> 280/395 nm) based on <math>\text{Cu}^{2+}</math> complex of 2,6-bis(2-benzimidazolyl)pyridine was developed for <math>\text{P}_2\text{O}_7^{4-}</math>, due to the formation of a ternary complex of probe–<math>\text{Cu}^{2+}</math>–<math>\text{P}_2\text{O}_7^{4-}</math>, with quantitative detection range of 3–90 <math>\mu\text{M}</math> at a neutral pH</p>                                                                                                                                                                                                    | no data                                                                                                                                                                                                               | no data                                                                                                                                                               | no data                          |
|  <p><i>J. Fluoresc.</i>, 2011, <b>21</b>, 701</p>         | <p>constructed by a copper complex (receptor) and eosin Y (indicator), an ensemble displayed fluorescent off-on (<math>\lambda_{ex}/\lambda_{em}</math> 523/543 nm) recognition of <math>\text{P}_2\text{O}_7^{4-}</math> in water at pH 7.4</p>                                                                                                                                                                                                                                                                                                                                                                                                | $1.17 \times 10^5$<br>$\text{M}^{-1}$ for<br>$\text{P}_2\text{O}_7^{4-}$                                                                                                                                              | no data                                                                                                                                                               | no data                          |
|  <p><i>This work</i></p>                                  | <p>fluorescence quenching (<math>\lambda_{ex}/\lambda_{em}</math> 350/470 nm) upon binding to <math>\text{Cu}^{2+}</math> in <math>\text{CH}_3\text{CN}</math>–<math>\text{H}_2\text{O}</math> (99/1, v/v, 10 mM HEPES, pH 7.2), and fluorescent enhanced response (<math>\lambda_{ex}/\lambda_{em}</math> 350/464 nm) toward <math>\text{C}_2\text{O}_4^{2-}</math> and <math>\text{P}_2\text{O}_7^{4-}</math> in DMSO–<math>\text{H}_2\text{O}</math> (1/1, v/v, 10 mM HEPES, pH 7.2)</p>                                                                                                                                                     | $3.28 \times 10^3$<br>$\text{M}^{-1}$ for<br>$\text{Cu}^{2+}$ , $2.23 \times 10^4$ $\text{M}^{-1}$ for<br>$\text{C}_2\text{O}_4^{2-}$ and<br>$4.96 \times 10^4$<br>$\text{M}^{-1}$ for<br>$\text{P}_2\text{O}_7^{4-}$ | 0.12 $\mu\text{M}$<br>for $\text{Cu}^{2+}$ ,<br>0.28 $\mu\text{M}$<br>for $\text{C}_2\text{O}_4^{2-}$<br>and 0.55<br>$\mu\text{M}$ for<br>$\text{P}_2\text{O}_7^{4-}$ | completed within several seconds |
